# Supplementary material for: Tbx5a lineage tracing shows cardiomyocyte plasticity during zebrafish heart regeneration
Source: PubMed Central journal article supplement (PMC5789846; doi:10.1038/s41467-017-02650-6), 2018-01-30
Supplement: 41467_2017_2650_MOESM5_ESM.pdf [file 41467_2017_2650_MOESM5_ESM.pdf]

Supplementary Data 2. Sequence of the plasmid used for recombineering of the tbx5a:tdTomato BAC.

LOCUS tdTomato\_tbx5a\_homology\_arms 7528 bp ds-DNA linear  
09-AUG-2017

COMMENT ApEinfo:methylated:1  
FEATURES Location/Qualifiers  
misc\_feature 675..1252  
/label=5'arm  
/ApEinfo\_fwdcolor=#ff0000  
/ApEinfo\_revcolor=green  
/ApEinfo\_graphicformat=arrow\_data {{0 1 2 0 0 -1}} {} 0}  
width 5 offset 0  
misc\_feature 4847..5313  
/label=5'arm(1)  
/ApEinfo\_label=5'arm  
/ApEinfo\_fwdcolor=#ff0000  
/ApEinfo\_revcolor=green  
/ApEinfo\_graphicformat=arrow\_data {{0 1 2 0 0 -1}} {} 0}  
width 5 offset 0  
misc\_feature 3612..4412  
/label=Neor/KanR  
/ApEinfo\_fwdcolor=#00ff00  
/ApEinfo\_revcolor=green  
/ApEinfo\_graphicformat=arrow\_data {{0 1 2 0 0 -1}} {} 0}  
width 5 offset 0  
misc\_feature complement(6540..7400)  
/label=AmpR  
/ApEinfo\_fwdcolor=#ff00ff  
/ApEinfo\_revcolor=green  
/ApEinfo\_graphicformat=arrow\_data {{0 1 2 0 0 -1}} {} 0}  
width 5 offset 0  
misc\_feature 4732..4766  
/label=FRT  
/ApEinfo\_fwdcolor=#ff8000  
/ApEinfo\_revcolor=green  
/ApEinfo\_graphicformat=arrow\_data {{0 1 2 0 0 -1}} {} 0}  
width 5 offset 0  
misc\_feature 2938..2972  
/label=FRT(1)  
/ApEinfo\_label=FRT  
/ApEinfo\_fwdcolor=#ff8000  
/ApEinfo\_revcolor=green  
/ApEinfo\_graphicformat=arrow\_data {{0 1 2 0 0 -1}} {} 0}  
width 5 offset 0  
misc\_feature 1255..2685  
/label=tdTomato  
/ApEinfo\_fwdcolor=#ff8000  
/ApEinfo\_revcolor=#ff8000  
/ApEinfo\_graphicformat=arrow\_data {{0 1 2 0 0 -1}} {} 0}  
width 5 offset 0

ORIGIN  
1 CTA AATTGTA AGCGTTAATA TTTTGTAAA ATTCGCGTTA AATTTTTGTT AAATCAGCTC  
61 ATTTTTTAAC CAATAGGCCG AAATCGGCAA AATCCCTTAT AAATCAAAAAG AATAGACCGA  
121 GATAGGGTTG AGTGTGTTC CAGTTTGGAA CAAGAGTCCA CTATTAAGA ACGTGGACTC  
181 CAACGTCAA GGGCGAAAAA CCGTCTATCA GGGCGATGGC CCACTACGTG AACCATCACC  
241 CTAATCAAGT TTTTGGGGT CGAGGTGCC TAAAGCACTA AATCGGAACC CTAAAGGGAG  
301 CCCCATTGTT AGAGCTTGAC GGGGAAAGCC GGCGAACGTG GCGAGAAAAGG AAGGGAAGAA  
361 AGCGAAAGGA GCGGGCGCTA GGGCGCTGGC AAGTGTAGCG GTCACGCTGC GCGTAACCAC  
421 CACACCCGCC GCGCTTAATG CGCCGCTACA GGGCGCGTCC CATTGCGCCAT TCAGGCTGCG  
481 CAACTGTTGG GAAGGGCGAT CGGTGCGGGC CTCTTCGCTA TTACGCCAGC TGGCGAAAAGG  
541 GGGATGTGCT GCAAGGCGAT TAAGTTGGGT AACGCCAGGG TTTTCCCAGT CACGACGTTG  
601 TAAAACGAGT GCCAGTGAAT TGTAATACGA CTCACTATAG GGCGAATTGG GTACCCGGCC  
661 CCCCCTCGAG TTCGACTTAT AGGCCAGCAA TCGCTTCAGA TTCATGAAT ATCGGTGTAC  
721 AAATATTAG TGATACACAC ATAATCATCA ACTGTTGGTT ATTTAATAGA AAACCAGCTA

Supplementary Data 1

781 TCGTTCACCA GTGCATTTGT TTTCTGAAC TACAATAAAG TTTTAATGGA GGCCCGTGTT  
841 TTGATTTTAT CCACAGACTG GTTTTAAGAA AATATAAGCC GCATTGAAAC CTCTTTGTGA  
901 TGTGCATTTT AATGTGCGTG TTTGGTGCAA AGTTGAGTCC ACCTGAATAA TGTTTTGTGA  
961 GAGAGCTCCA AATTATAAAA TGTTTAATAG GATCAGAGTT TTATTCTTAT TGATAAATGT  
1021 TTGCTTTTTT CTAATTAACA CTGCTGTACT GTAATAAAGT TAATTTTCGGT TGTTGTTGAA  
1081 TGTTTTTCATT AAATCAGATT CAAGAGCACA CTGATAAGTT ATATCACCGT AATCAAATGC  
1141 ATACGGGCGT CTTGAAGTGA TGCAATCTGA ACTAAACTGC AGAAATATTT GATGTA AAAAT  
1201 CTTTTTGTGTT CTGTATTTAG GCCTCACGGT AGACATCGTA CAGGCCTCTC CGCCatggtg  
1261 agcaaggcg aggaggtcat caaagagttc atgctgctca aggtgctgcat ggagggctcc  
1321 atgaacggcc acgagttcga gatcagggc gagggcgagg gccgccccta cgagggcacc  
1381 cagaccgcca agctgaaggt gaccaagggc ggccccctgc ccttcgctg ggacatcctg  
1441 tccccccagt tcatgtacgg ctccaaggcg tacgtgaagc accccgcca catccccgat  
1501 tacaagaagc tgtccttccc cgagggcttc aagtgggagc gcgtgatgaa cttcaggagc  
1561 ggcggtctgg tgaccgtgac ccaggactcc tccctgcagg acggcacgct gatctacaag  
1621 gtgaagatgc gcgccacca cttccccccc gacggccccg taatgcagaa gaagaccatg  
1681 ggctgggagg cctccaccga gcgctgtac ccccgcgacg gcgtgctgaa gggcgagatc  
1741 caccaggccc tgaagctgaa ggacggcggc cactacctgg tggagttcaa gaccatctac  
1801 atggccaaga agcccgtgca actgcccggc tactactacg tggacacca gctggacatc  
1861 acctcccaca acgaggacta caccatcgtg gaacagtacg agcgtctccg gggccgccac  
1921 cacctggttcc tggggcatgg accggcagcg gcagctcccg caccgcctcc  
1981 tccgggaca acaacatggc cgtcatcaa gagttcatgc gcttcaaggt gcgcatggag  
2041 ggctccatga acggccacga gttcgagatc gagggcgagg gcgagggccg cccctacgag  
2101 ggacaccaga ccgccaagct gaaggtgacc aagggcggcc ccctgcccct gcctgggac  
2161 atcctgtccc cccagttcat gtacggctcc aaggcgtacg tgaagcacc cgccgacatc  
2221 cccgattaca agaagctgtc cttccccgag ggcttcaagt gggagcgcgt gatgaacttc  
2281 gagcagggcg gtctggtag cgtgaccag gactcctccc tgcaggacgg cacgtgatc  
2341 tacaaggtga agatgctgag caccaacttc cccccgacg gccccgtaat gcagaagaag  
2401 accatgggct gggaggcctc caccgagcgc ctgtaccccc gcgacggcgt gctgaagggc  
2461 gagatccacc aggccctgaa gctgaaggac ggcgccgct acctggtgga gttcaagacc  
2521 atctacatgg ccaagaagcc cgtgcaactg cccggctact actacgtgga caccaagctg  
2581 gatcaccct cccacaacga ggactacacc atcgtggaac agtacgagcg ctcgagggc  
2641 cgccaccacc tgttcctgta cggctggag gagctgtaca agtaaAGCGG CCGCGACTCT  
2701 AGATCATAAT CAGCCATACC ACATTTGTAG AGGTTTTACT TGCTTTAAAA AACCTCCAC  
2761 ACCTCCCCCT GAACCTGAAA CATAAAATGA ATGCAATTGT TGTTGTTAAC TTGTTTATTG  
2821 CAGCTTATAA TGGTTACAAA TAAAGCAATA GCATCACAAA TTTACAAAAT AAAGCATTTT  
2881 TTTCACTGCA TTCTAGTTGT GGTGTGTTCA AACTCATCAA GCTTGATATC GAATTCGGAA  
2941 GTTCTATTTC TTAGAAAAT ATAGAACTT CAGGCTGAA GAGGAGTTTA GAGCTCAGCA  
3001 AGTAGCTTTG GCTGCAGGTC GTCGAAATTC TACCGGTAG TACCGGTAG TTTCCCAAGG  
3061 CAGTCTGGAG CATGCGCTTT AGCAGCCCCG CTGGGCACTT GCGGCTACAC AAGTGGCCTC  
3121 TGGCCTCGCA CACATTCCAC ATCCACCGGT AGGCGCCAAC CGGCTCCGTT CTTTGGTGGC  
3181 CCCTTCGCGC CACCTTCTAC TCCTCCCCTA GTCAGGAAGT TCCCCCCCCG CCCGCAGCTC  
3241 GCGTCGTGCA GGACGTGACA AATGGAAGTA GCACGTCTCA CTAGTCTCGT GCAGATGGAC  
3301 AGCAATGGAA AGCGGTAGG CCGGCTGAA CTTTGGGGCA GCGGCTAAGT GCGATTTGTC  
3361 TCCTTCGCTT TCTGGGCTCA GAGGTGTTGA AGGGGTGGGT CCGGGGGCGG GCTCAGGGGC  
3421 GGGCTCAGGG GCGGGGCGGG CGCCGAAGG TCCTCCGGAG GCCCGGCATT CTGCACGCTT  
3481 CAAAAGCGCA CGTCTGCCGC GCTGTTCTCC TCTTCCTCAT CTCCGGGCTC TTCGACCTGC  
3541 AGCCTGTTGA CAATTAATCA TCGGCATAGT ATATCGGCAT AGTATAATAC GACAAGGTGA  
3601 GAACTAAAC CATGGGATCG GCCATTGACT AAGATGGATT GCACGCAGGT TCTCCGGCCG  
3661 CTTGGGTGGA GAGGCTATTG GGCTATGACT GGGCACACA GACAATCGGC TGCTCTGATG  
3721 CCGCCGTGTT CCGGCTGTCA GCGCAGGGGC GCCCGTTCT TTTTGTCAAG ACCGACCTGT  
3781 CCGGTGCCCT GAATGAACTG CAGGACGAGG CAGCGCGGCT ATCGTGGCTG GCCACGACGG  
3841 GCGTTCCTTG CGCAGCTGTG CTCGACGTTG TCACTGAAGC GGAAGGGGAC TGGCTGCTAT  
3901 TGGGCGAAGT GCCGGGGCAG GATCTCCTGT CATCTCACCT TGCTCCTGCC GAGAAAAGTAT  
3961 CCATCATGGC TGATGCAATG CCGCGGCTGC ATACGCTTGA TCCGGTACC TGCCATTTCG  
4021 ACCACCAAGC GAAACATCGC ATCGAGCTGAG CACGTAICTG GATGGAAGCC GGTCTTGTTCG  
4081 ATCAGGATGA TCTGGACGAA GAGCATCAGG GGCTCGCGCC AGCCGAAGT TCCGCCAGGC  
4141 TCAAGGCGCG CATGCCCGAC GCGGATGATC TCGTCGTGAC CCATGGCGAT GCCTGCTTGC  
4201 CGAATATCAT GGTGAAAAAT GGCCGCTTTT CTGGATTCTAT CACTGTGGC CGGCTGGGTG  
4261 TGGCGGACCG CTATCAGGAC ATAGCGTTTG CTACCCGTGA TATTGCTGAA GAGCTTGGCG  
4321 GCGAATGGG TGACCGCTTC CTCGTCTTTG ACGGTATCGC CGTCCCCTG TCGCAGCGCA  
4381 TCGCCTTCTA TCGCCTTCT GACGAGTTCT TCTGAGGGGA TCAATTCTCT AGAGCTCGCT  
4441 GATCAGCCTC GACTGTGCCT TCTAGTTGCC AGCCATCTGT TGTTTGCCCC TCCCCGTGC  
4501 CTTCTTTGAC CCTGGAAGGT GCCACTCCA CTGTCTTTT CTAATAAAAT GAGGAAATTG  
4561 CATCGCATTG TCTGAGTAGG TGTCATTCTA TTCTGGGGGG TGGGGTGGGG CAGGACAGCA  
4621 AGGGGGAGGA TTGGGAAGAC AATAGCAGG ATGCTGGGGA TGCGGTGGG TCTATGGCTT  
4681 CTGAGCGGGA AAGAACCAG TGGGCTCGA CTAGAGCTTG CGGAACCTT CGAAGTCTCT  
4741 ATTCTCTAGA AAGTATAGGA ACTTATCAG TCAGGTACAT AATATAACTT CGTATAATGT  
4801 ATGCTATACG AAGTTATTAG GTGGATCCAC TAGTTCTAGA GCGGCCCGG ACAGTGAAGA

Supplementary Data 1

4861 CACCTTTTCGG CTCCAAAACCT CTCCCAGTGA CAGCGAACCA AAAGATTTAC AAAACGAAGG  
4921 AAAATCAGAC AAACAGAATG CAGCCGTCAG CAAATCCCCG TCATCGCAGA CTACATACAT  
4981 TCAACAGGTA ACGTCAACTA GTGCCTCGAT GGTGCGTGTG CGTGTGTGTG TGTGTGTGCA  
5041 AGTGCTTTAT GGTAAACTAA ACCTGATAAA CACCTCTCTT TTAGAATTAT TTCGATCATT  
5101 TTCATATTCA AAAACTTTTT ATTTAGCTTT AGGTTAGTTA TTTATATTAA AAACACTAGT  
5161 ATATAAGTAA CTAAAATAAA CATTCAACAG ATAACCTTTAA CTAGTGTCTT GGCGTGTGCG  
5221 TGTGTGTGTG CCCAGAGTCT TTAGTAATTT TAAGTATTAA TAAAAATTTA AGAAATGCAA  
5281 TATGTTTTCA CGTGGGCTAC AGTTATTTAT ATAccgcggT GGAGCTCCAG CTTTTGTTCC  
5341 CTTTAGTGAG GGTTAATTTT GAGCTTGGCG TAATCATGGT CATAGCTGTT TCCTGTGTGA  
5401 AATTGTTATC CGCTCACAAT TCCACACAAC ATACGAGCCG GAAGCATAAA GTGTAAAGCC  
5461 TGGGGTGCCT AATGAGTGAG CTAACTCACA TTAATTGCGT TGCCTCACT GCCCGCTTTC  
5521 CAGTCGGGAA ACCTGTCTGT CCAGCTGCAT TAATGAATCG GCCAACGCGC GGGGAGAGGC  
5581 GGTTTGCCTA TTGGGCGCTC TTCCGCTTCC TCGCTCACTG ACTCGCTGCG CTCGGTCTGT  
5641 CGGCTGCGG GAGCGGTATC AGTCTTCTCC AAGGCGGTAA AAGGCGGTAA TACGGTTATC  
5701 GGGGATAACG CAGGAAAGAA CATGTGAGCA AAAGGCCAGC AAAAGGCCAG GAACCGTAAA  
5761 AAGGCCGCGT TGCTGGCGTT TTTCCATAGG CTCCGCCCC CTGACGAGCA TCACAAAAAT  
5821 CGACGCTCAA GTCAGAGGTG GCGAAACCCG ACAGGACTAT AAAGATACCA GGCGTTTCCC  
5881 CCTGGAAGCT CCCTCGTGCG CTCTCCTGTT CCGACCCTGC CGCTTACCGG ATACCTGTCC  
5941 GCCTTTCTCC CTTCCGGAAG CGTGGCGCTT TCTCATAGCT CACGCTGTAG GTATCTCAGT  
6001 TCGGTGTAGG TCGTTCGCTC CAAGTGGGC TGTGTGCACG AACCCCTGAT TCAGCCCCGAC  
6061 CGCTGCGCCT TATCCGGTAA CTATCGTCTT GAGTCCAACC CGGTAAGACA CGACTTATCG  
6121 CCACTGGCAG CAGCCACTGG TAACAGGATT AGCAGAGCGA GGTATGTAGG CGGTGCTACA  
6181 GAGTCTTGA AGTGGTGGCC TAACTACGGC TACACTAGAA GAACAGTATT TGGTATCTGC  
6241 GCTCTGCTGA AGCCAGTTAC CTTCCGAAAA AGAGTTGGTA GCTCTTGATC CGGCAAAACA  
6301 ACCACCGTG GTAGCGGTGG TTTTTTTGTT TGCAAGCAGC AGATTACGCG CAGAAAAAAA  
6361 GGATCTCAAG AAGATCCTTT GATCTTTTCT ACGGGGTCTG ACGCTCAGTG GAACGAAAAC  
6421 TCACGTTAAG GGATTTTGGT CATGAGATTA TCAAAAAGGA TCTTCACTA GATCCTTTTA  
6481 AATTA AAAAAT GAAGTTTTAA ATCAATCTAA AGTATATATG AGTAAACTTG GTCTGACAGT  
6541 TACCAATGCT TAATCAGTGA GGCACCTATC TCAGCGATCT GTCTATTTTC TTCATCCATA  
6601 GTTGCCCTGAC TCCCGTCTGT GTAGATAACT ACGATACGGG AGGGCTTACC ATCTGGCCCC  
6661 AGTGTGCAA TGATACCGCG AGACCCACGC TCACCGGCTC CAGATTTATC AGCAATAAAC  
6721 CAGCCAGCCG GAAGGGCCGA GCGCAGAAGT GGTCTGCAA CTTTATCCGC CTCCATCCAG  
6781 TCTATTAATT GTTGCCGGGA AGCTAGAGTA AGTAGTTCGC CAGTTAATAG TTTGCGCAAC  
6841 GTTGTTGCCA TTGCTACAGG CATCGTGGTG TCACGCTCGT CGTTTGGTAT GGCTTCATTC  
6901 AGCTCCGGTT CCCAACGATC AAGGCGAGTT ACATGATCCC CCATGTTGTG CAAAAAAGCG  
6961 GTTAGCTCCT TCGGTCCTCC GATCGTTGTC AGAAGTAAGT TGGCCGCGT GTTATCACTC  
7021 ATGGTTATGG CAGCACTGCA TAATTTCTT ACTGTCATGC CATCCGTAAG ATGCTTTTCT  
7081 GTGACTGGTG AGTACTCAAC CAAGTCATTC TGAGAATAGT GTATGCGGCG ACCGAGTTGC  
7141 TCTTGCCCCG CGTCAATACG GGATAATACC GCGCCACATA GCAGAACTTT AAAAGTGCTC  
7201 ATCATTGGAA AACGTTCTTC GGGGCGAAAA CTCTCAAGGA TCTTACCGCT GTTGAGATCC  
7261 AGTTCGATGT AACCCACTCG TGCACCCAAC TGATCTTCAG CATCTTTTAC TTTCAACCAGC  
7321 GTTTCTGGGT GAGCAAAAAC AGGAAGGCAA AATGCCGCAA AAAAGGGAAT AAGGGCGACA  
7381 CGGAAATGTT GAATACTCAT ACTCTTCTT TTTCAATATT ATTTGAGCAT TTATCAGGGT  
7441 TATTGTCTCA TGAGCGGATA CATATTTGAA TGTATTTAGA AAAATAAACA AATAGGGGTT  
7501 CCGCGCACAT TTCCCCGAAA AGTGCCAC

//
