# Supplementary material for: Tbx5a lineage tracing shows cardiomyocyte plasticity during zebrafish heart regeneration
Source: PubMed Central journal article supplement (PMC5789846; doi:10.1038/s41467-017-02650-6), 2018-01-30
Supplement: 41467_2017_2650_MOESM6_ESM.pdf [file 41467_2017_2650_MOESM6_ESM.pdf]

Supplementary Data 3. Sequence of the plasmid containing mCherry-p2a-CreERT2-flp-kan-flp used as a template for recombineering.

LOCUS Exported 7593 bp ds-DNA circular SYN 30-AGO-2016  
 DEFINITION synthetic circular DNA

REFERENCE 1 (bases 1 to 7593)  
 AUTHORS .  
 TITLE Direct Submission  
 JOURNAL Exported martes, 30 de ago de 2016 from SnapGene Viewer 3.0.3  
<http://www.snapgene.com>

FEATURES Location/Qualifiers  
 source 1..7593  
 /organism="synthetic DNA construct"  
 /mol\_type="other DNA"  
 misc\_feature 413..435  
 /label=SP6  
 /note="SP6"  
 misc\_feature 439..1146  
 /label=mCherry  
 /note="mCherry"  
 misc\_feature 1147..1212  
 /label=P2A  
 /note="P2A"  
 misc\_feature 1213..3198  
 /label=CreERT2  
 /note="CreERT2"  
 misc\_feature 3226..3464  
 /label=SV40 polIA  
 /note="SV40 polIA"  
 misc\_feature 3509..3543  
 /label=FRT  
 /note="FRT"  
 misc\_feature 3798..3936  
 /label=SV40 polIA(1)  
 /note="SV40 polIA(1)"  
 misc\_feature 3987..4779  
 /label=KanR  
 /note="KanR"  
 misc\_feature 4860..4894  
 /label=FRT(1)  
 /note="FRT(1)"

ORIGIN  
 1 tgcgcggttt cggatgatgac ggtgaaaacc tctgacacat gcagctcccg gagacgggtca  
 61 cagcttgtct gtaagcggat gccgggagca gacaagcccg tcagggcgcg tcagcggggtg  
 121 ttggcgggtg tcggggctgg cttaactatg cggcatcaga gcagattgta ctgagagtgc  
 181 accatatgcg gtgtgaaata ccgcacagat gcgtaaggag aaaataccgc atcaggcgcc  
 241 attcgccatt caggctgcgc aactgttggg aaggcgatc ggtgcgggcc tcttcgctat  
 301 tacgccagct ggcgaaagg ggatgtgctg caaggcgatt aagttgggta acgccaggt  
 361 tttcccagtc acgacgttgt aaaacgacgg ccagtgcca gctcggcgcg ccatttaggt  
 421 gacactatag aagagaccat ggtgagcaag ggcgaggagg ataacatggc catcatcaag  
 481 gagttcatgc gcttcaaggt gcacatggag ggctccgtga acggccacga gttcagatc  
 541 gagggcgagg gcgagggccg cccctacgag ggcacccaga ccgccaagct gaaggtgacc  
 601 aagggtggcc ccctgccctt cgcctgggac atcctgtccc ctgagttcat gtacggctcc  
 661 aaggcctacg tgaagcacc cgccgacatc cccgactact tgaagctgtc cttccccgag  
 721 ggcttcaagt gggagcgcgt gatgaacttc gaggacggcg gcgtggtgac cgtgaccag  
 781 gactcctccc tgcaggacgg cgagttcatc tacaaggtga agctgcgcgg caccaacttc  
 841 ccctccgacg gccccgtaat gcagaagaag accatgggct gggaggcctc ctccgagcgg  
 901 atgtacccc aggacggcgc cctgaagggc gagatcaagc agaggctgaa gctgaaggac  
 961 ggcggccact acgacgtga ggtcaagacc acctacaagg ccaagaagcc cgtgcagctg  
 1021 cccggcgcct acaacgtcaa catcaagttg gacatcacct cccacaacga ggactacacc  
 1081 atcgtggaac agtacgaac cgccgagggc cgccactcca cggcgggcat ggacgagctg  
 1141 tacaagggaa gcggagctac taacttcagc ctgctgaagc aggttgagga cgtggaggag  
 1201 aaccctggac ctgctagctc caacctgctg actgtgcacc aaaacctgcc tgccctccct  
 1261 gtggatgcca cctctgatga agtcaggaag aacctgatgg acatgttccg ggacagccag  
 1321 gcttctctg aacacactg gaagatgctc ctgtctgtgt gcagatcctg ggcctcctgg  
 1381 tgcaagctga acaacaggaa atggttcctt gctgaacctg aggatgtgag ggactacctc

Supplementary Data 2

1441 ctgtacctgc aagccagagg cctggctgtg aagaccatcc aacagcacct gggccagctc  
1501 aacatgctgc acaggagatc tggccttctg cgcccttctg actccaatgc tgtgtccctg  
1561 gtgatgagga gaatcagaaa ggagaatgtg gatgctgggg agagagccaa gcaggccctg  
1621 gcctttgaac gcaactgact tgaccaagtc agatccctga tggagaactc tgacagatgc  
1681 caggacatca ggaacctggc cttcctgggc attgcctaca acaccctgct gcgcattgcc  
1741 gaaattgcca gaatcagagt gaaggacatc tcccgcaccg atggtgggag aatgctgatc  
1801 cacattggca ggaccaagac cctgggtgtc acagctgggtg tggagaaggc cctgtccctg  
1861 ggggttacca agctgggtga gagatggatc tctgtgtctg gtgtggctga tgaccccaac  
1921 aactacctgt tctgcccggg cagaaagaat aagtggtgctg ccccttctgc cacctcccaa  
1981 ctgtccaccc gggccctgga agggatcttt gaggccaccc accgcctgat ctatgggtgc  
2041 aaggatgact ctgggcagag atacctggcc tggcttggcc actctgccag agtgggtgct  
2101 gccagggaca tggccagggc tgggtgtgtc atccctgaaa tcatgcaggc tgggtggctgg  
2161 accaatgtga acattgtgat gaactacatc agaaacctgg actctgagac tggggctatg  
2221 gtgaggtgc ttgaggatgg ggacctcgag ccactgtctg gagacatgag agctgccaac  
2281 ctttggccaa gcccgtcat gatcaaacgc tctaagaaga acagcctggc cttgtccctg  
2341 acggccgacc agatggtcag tgccttgttg gatgctgagc cccccatact ctattccgag  
2401 tatgatccta ccagaccctt cagtgaagct tcgatgatgg gcttactgac caacctggca  
2461 gacagggagc tggttcacat gatcaactgg gcgaagaggg tgccaggctt tgtggatttg  
2521 accctccatg atcaggtcca ccttctagaa tgtgcctggc tagagatctt gatgatgtgt  
2581 ctctgtggc gctccatgga gcacctgagc aagctactgt ttgtcctaa cttgtccttg  
2641 gacaggaacc agggaaaatg tgtagagggc atgggtggaga tcttcgacat gctgtggct  
2701 acatcatctc ggttccgcat gatgaatctg cagggagagg agtttgtgtg cctcaaatct  
2761 attatthtgc ttaattctgg agtgacaca tttctgtcca gcaccctgaa gtctctggaa  
2821 gagaaggacc atatccaccg agtcttgac aagatcacag acactttgat ccacctgatg  
2881 gccaaaggcag gctgaccct gcagcagcag caccagcggc tggcccagct cctcctcatc  
2941 ctctcccaca tcaggcacat gagtaacaaa ggcatggagc atctgtacag catgaagtgc  
3001 aagaacgtgg tgcccctcta tgacctgtct cttgaggcgg cggacgcca ccgctacat  
3061 gcgcccacta gccgtggagg ggcattcctg gaggagacgg accaaagcca cttggccact  
3121 gcgggctcta cttcatcgca ttccttgcaa aagtattaca tcacggggga ggcagagggg  
3181 ttccctgcca cagcttgatg aagatctgag ctcgaattcg cccttaggcc tgcaggatca  
3241 taatcagcca taccacattt gtagagtttt tacttgtctt aaaaaacctc ccacctctc  
3301 ccctgaacct gaaacataaa atgaatgcaa ttgttgttgt taacttgttt attcagctt  
3361 ataattggtta caataaagc aatagcatca caaatttcac aaataaagca tttttttcac  
3421 tgcatcttag ttgtggtttg tccaaactca tcaatgtatc ttaaactagg ggggatctgc  
3481 tagcccggat ctagataact gatcagcttg aagttcctat actttctaga gaataggaac  
3541 ttcggaatag gaacttcaag atccccctgg cgaaaggggg atgtgtctga aggcgattaa  
3601 gttgggtaac gccagggttt tcgtcaggtg gcacttttctg gggaaatgtg cgcggaacct  
3661 ctatttgttt atttttctaa atacattcaa atagtatcc gctcatgaga caataacct  
3721 gataaatgct tcaataatat tgaaaaagga agagtcctga ggcggaaaga accagctgtg  
3781 gaatgtgtgt cagttagggg gtggaaagtc cccaggctcc ccagcaggca gaagtatgca  
3841 aagcatgcat ctcaattagt cagcaaccag gtgtggaaag tccccaggct cccagcagg  
3901 cagaagtatg caaagcatgc atctcaatta gtcagtaacc atagtccgca aagatcgatc  
3961 aagagacagg atgaggatcg tttcgcatac ttgaacaaga tggattgcac gcaggtctc  
4021 cggccgcttg ggtggagagg ctattcggct atgactgggc acaacagaca atcggctgct  
4081 ctgatgccgc cgtgttccgg ctgtcagcgc aggggcgccc ggttcttttt gtcaagaccg  
4141 acctgtccgg tgccctgaat gaactgcaag acgaggcagc gcggtatctg tggctggcca  
4201 cgacggcgt tccttgcgca gctgtgctcg acgttgtcac tgaagcggga agggactggc  
4261 tgctattggg cgaagtgccg gggcaggatc tcctgtcatc tcacctgtct cctgccgaga  
4321 aagtatccat catggtgat gcaatgcggc ggctgcatac gcttgatccg gctactgccc  
4381 cattcgacca ccaagcgaaa catcgcactc agcgagcacg tactcggatg gaagccggtc  
4441 ttgtcgatca ggatgatctg gacgaagagc atcaggggct cgcgccagcc gaactgttctg  
4501 ccaggctcaa ggcgagcatg cccgacggcg aggatctcgt cgtgaccat ggcgatgctt  
4561 gcttgccgaa tatcatggtg gaaaatggcc gcttttctgg attcatcgac tgtggccggc  
4621 tgggtgtggc ggaccgctat caggacatag cgttggctac ccgtgatatt gctgaagagc  
4681 ttggcggcga atgggctgac cgcttctctg tgctttacgg tatcgcgct cccgattcgc  
4741 agcgcatcgc cttctatcgc cttcttgacg agttcttctg aggggatcgg caataaaaag  
4801 acagaataaa acgcacgggt gttgggtcgt ttgttcggat ccgagcttca aaagcgtctt  
4861 gaagttccta tactttctag agaataggaa cttcggaaata gtaacttctc catggtagcc  
4921 tccaaaaag cctcctcact acttctggac tagtgcgcc gccagagctg gccactgctt  
4981 tgggagcctt cctgggcctc ctggcagttg cagcaatggc aggcctaac tttcccaga  
5041 tagacacccc caactgcta cctgccacc atcgccaaaa gagagatctg atttggaatc  
5101 aatgcacat cgatgaagag aaaaatgaat cgctgcccc ctatgtggga aaggtaagcc  
5161 tcgcgctcca gggatgatgg cattatcaac actggaccat agtcatggcc atgtagccaa  
5221 gatgggtgtg aataagattg gttatcattg gtgggtcggg gggacggaga ggaggcaaa  
5281 aacaggggtg taataatggt gaaagtgaca tgtgtgtctga tggttgtgat aggaaagaga  
5341 aattaattaa gagctcgaat tcgtaatcat ggtcatagct gtttctgtg tgaattgtt  
5401 atccgctcac aattccacac ccggaagcat aaagtgtaaa actggggtg  
5461 cctaattgagt gagctaactc acattaattg cgttgcgctc actgcccgtt ttccagctcg

Supplementary Data 2

5521 gaaacctgtc gtgccagctg cattaatgaa tcggccaacg cgcggggaga ggcggtttgc  
 5581 gtattgggcg ctcttccgct tcctcgctca ctgactcgct gcgctcggtc gttcggctgc  
 5641 ggcgagcggg atcagctcac tcaaaggcgg taatacgggt atccacagaa tcaggggata  
 5701 acgcaggaaa gaacatgtga gcaaaaggcc agcaaaaggc caggaaccgt aaaaaggccg  
 5761 cgttgctggc gtttttccat aggctccgcc cccctgacga gcatcacaaa aatcgacgct  
 5821 caagtacagag gtggcgaaac ccgacaggac tataaagata ccaggcgttt ccccctggaa  
 5881 gctccctcgt gcgctctcct gttccgacct tgccgcttac cggatacctg tccgcctttc  
 5941 tcccttcggg aagcgtggcg ctttctcaaa gctcacgctg taggtatctc agttcgggtg  
 6001 aggtcgttcg ctccaagctg ggctgtgtgc acgaaccccc cgttcagccc gaccgctgcg  
 6061 cttatccgg taactatcgt cttgagtcca acccgtaag acacgactta tcgccactgg  
 6121 cagcagccac tggtaacagg attagcagag cgaggatgt aggcggtgct acagagttct  
 6181 tgaagtggg gcctaactac ggctacacta gaagaacagt atttggatc tgcgctctgc  
 6241 tgaagccagt taccttcgga aaaagagttg gtagctcttg atccggcaaa caaaccaccg  
 6301 tggtagcgg ttgtttttt gtttgaagtc agcagattac gcgcagaaaa aaaggattctc  
 6361 aagaagatcc tttgatcttt tctacggggt ctgacgctca gtggaacgaa aactcacggt  
 6421 aagggatttt ggtcatgaga ttatcaaaaa ggatcttcac ctagatcctt ttaaattaa  
 6481 aatgaagttt taaatcaatc taaagtatat atgagtaaac ttggtctgac agttaccaat  
 6541 gcttaatcag tgaggcacct atctcagcga tctgtctatt tcgttcatcc atagttgctt  
 6601 gactccccgt cgtgtagata actacgatac gggagggtt accatctggc cccagtgtg  
 6661 caatgatacc gcgagacca cgctcaccgg ctccagattt atcagcaata aaccagccag  
 6721 ccggaaggcg cgagcgcaga agtggtcctg caactttatc cgcctccatc cagtctatta  
 6781 attgttgccg ggaagctaga gtaagtagtt cgccagttaa tagtttgccg aacgttggtg  
 6841 ccattgctac aggcatcgtg gtgtcacgct cgctgtttg tatggcttca ttcagctccg  
 6901 gttcccaacg atcaaggcga gttacatgat cccccatggt gtgcaaaaaa gcggttagct  
 6961 cttcgggtcc tccgatcgtt gtcagaagta agttggccgc agtgttatca ctcatggta  
 7021 tggcagcact gcataattct cttactgtca tgccatccgt aagatgcttt tctgtgactg  
 7081 gtgagtactc aaccaagtca ttctgagaat agtgtatgcg gcgaccgagt tgctcttgcc  
 7141 cggcgtcaat acgggataat accgcgccac atagcagaac tttaaaagtg ctcatcattg  
 7201 gaaaacgttc ttcggggcga aaactctcaa ggatcttacc gctgttgaga tccagttcga  
 7261 tgtaaccac tcgtgcaccc aactgatctt cagcatcttt tactttcacc agcgtttctg  
 7321 ggtgagcaaa aacaggaagg caaaatgccg caaaaaaggg aataagggcg acacggaaat  
 7381 gttgaatact catactcttc ctttttcaat attattgaag catttatcag ggttattgct  
 7441 tcatgagcgg atacatattt gaatgtattt agaaaaataa acaaataggg gttccgcgca  
 7501 catttccccg aaaagtgcc cctgacgtct aagaaacat tattatcatg acattaacct  
 7561 ataaaaatag gcgtatcac aggcctttc gtc

//
