# Supplementary material for: Tbx5a lineage tracing shows cardiomyocyte plasticity during zebrafish heart regeneration
Source: PubMed Central journal article supplement (PMC5789846; doi:10.1038/s41467-017-02650-6), 2018-01-30
Supplement: 41467_2017_2650_MOESM8_ESM.pdf [file 41467_2017_2650_MOESM8_ESM.pdf]

Supplementary Data 5. Sequence of the plasmid containing  
 loxP\_tagBFP\_loxP\_mCherry-NTR- flp-kan-flp used as a template for recombineering.

LOCUS loxP-myctagBFP-STOP-lox-mCherryNTR fl Kan 7515 bp  
 ds-DNA circular SYN 30-AGO-2016  
 DEFINITION synthetic circular DNA

REFERENCE 1 (bases 1 to 7515)  
 AUTHORS .  
 TITLE Direct Submission  
 JOURNAL Exported martes, 30 de ago de 2016 from SnapGene Viewer 3.0.3  
<http://www.snapgene.com>

FEATURES  
 Location/Qualifiers  
 source 1..7515  
 /organism="synthetic DNA construct"  
 /mol\_type="other DNA"  
 misc\_feature 432..465  
 /label=LoxP  
 /note="LoxP"  
 misc\_feature 466..472  
 /label=kozak  
 /note="kozak"  
 misc\_feature 473..475  
 /label=ATG  
 /note="ATG"  
 misc\_feature 476..505  
 /label=myc  
 /note="myc"  
 misc\_feature 506..1225  
 /label=tagBFP  
 /note="tagBFP"  
 misc\_feature 1226..1729  
 /label=Rabbit beta globin terminator  
 /note="Rabbit beta globin terminator"  
 misc\_feature 1730..1763  
 /label=LoxP(1)  
 /note="LoxP(1)"  
 misc\_feature 1778..1784  
 /label=kozak(1)  
 /note="kozak(1)"  
 misc\_feature 1785..2493  
 /label=mCherry  
 /note="mCherry"  
 misc\_feature 2494..2543  
 /label=Linker  
 /note="Linker"  
 misc\_feature 2544..3197  
 /label=NTR  
 /note="NTR"  
 misc\_feature 3216..3454  
 /label=SV40 pol iA  
 /note="SV40 pol iA"  
 misc\_feature 3491..3525  
 /label=FRT  
 /note="FRT"  
 misc\_feature 3780..3918  
 /label=Sv40 pol iA  
 /note="Sv40 pol iA"  
 misc\_feature 3969..4761  
 /label=KanR  
 /note="KanR"  
 misc\_feature 4842..4876  
 /label=FRT(1)  
 /note="FRT(1)"

ORIGIN  
 1 tcgcgcggtt cggtgatgac ggtgaaacc tctgacacat gcagctccc gagacgggtca  
 61 cagcttgtct gtaagcggat gccgggagca gacaagccc tcagggcgcg tcagcgggtg  
 121 ttggcgggtg tcggggctgg cttaactatg cggcatcaga gcagattgta ctgagagtgc

Supplementary Data 4

181 accatatgcg gtgtgaaata cgcacagat gcgtaaggag aaaataccgc atcaggcgcc  
241 attcgccatt caggctgccc aactgttggg aagggcgatc ggtgcccccc tcttcgctat  
301 tacgccagct ggcgaaaggg ggatgtgctg caaggcgatt aagttgggta acgccagggg  
361 tttcccagtc acgacgttgt aaaacgacgg ccagtgccaa gctcggcgcg cccgggaccg  
421 gtggatccac tataacttcg tatagcatac attatacгаа gttatcgcca ccatggagca  
481 gaagctgac tcagaggagg acctgatgag cgagctgatt aaggagaaca tgcacatgaa  
541 gctgtacatg gagggcaccg tggacaacca tcacttcaag tgcacatccg agggcgaagg  
601 caagccctac gagggcaccg agaccatgag aatcaagggt gtcgagggcg gccctctccc  
661 cttcgccctt gacatcctgg ctactagctt cctctacggc agcaagacct tcatcaacca  
721 caccagggc atccccgact tcttcaagca gtccttccct gagggcttca catgggagag  
781 agtcaccaca tacgaagacg gggcgctgct gaccgctacc caggacacca gcctccagga  
841 cggctgcctc atctacaacg tcaagatcag aggggtgaac ttcacatcca acggccctgt  
901 gatgcagaag aaaacactcg gctgggaggc cttcaccgag acgctgtacc ccgctgacgg  
961 cggcctggaa ggcagaaacg acatggcctt gaagctcgtg ggcgggagcc atctgatcgc  
1021 aaacatcaag accacatata gatccaagaa acccgctaag aacctcaaga tgcctggcgt  
1081 ctactatgtg gactacagac tggaaagaat caaggaggcc aacaacgaga cctacgtcga  
1141 gcagcacgag gtggcagtg ccagatactg cgacctccct agcaaacctgg ggcacaagct  
1201 taattaaagc ggccgcactc ctcaggtgca ggctgcctat cagaagggtg tggctgggtg  
1261 ggccaatgcc ctggctcaca aataccactg agatcttttt cctctgcca aaaattatgg  
1321 ggacatcatg aagccccctg agcatctgac ttctggctaa taaagaaat ttattttcat  
1381 tgcaatagtg tgttggaaat ttttgtgtct ctcactcgga aggacatag ggagggcaaa  
1441 tcatttaaaa catcagaatg agtatttggg ttagagtttg gcaacatatg cccatagtct  
1501 ggctgccatg aacaaagggt ggctataaag aggtcatcag tatatgaaac agccccctgc  
1561 tgtccattcc ttattccata gaaaagcctt gacttgagggt tagatTTTTT ttatattttg  
1621 ttttgtgtaa tttttttctt taacatccct aaaattttcc ttacatgttt tactagccag  
1681 atttttcctc ctctcctgac tactccccgt catagctgtc cctcttctca taacttcgta  
1741 tagcatacat tatacgaagt tatcggatcc catcgatcgc caccatggtg agcaagggcg  
1801 aggaggataa catggccatc atcaaggagt tcatgctgct caagggtgcac atggagggct  
1861 ccgtgaacgg ccacgagttc gagatcgagg gcgagggcga gggccgcccc tacgagggca  
1921 cccagaccgc caagctgaag gtgaccaagg gtggccccct gcccttcgcc tgggacatcc  
1981 tgtccccctc gttcatgtac ggtccaagg cctacgtgaa gcaccccgcc gacatccccg  
2041 actacttgaa gctgtccttc cccgagggtt tcaagtggga gcgctgtatg taacttcgag  
2101 acggcgggcgt ggtgaccgtg acccaggact cctccctgca ggacggcgag ttcatctaca  
2161 aggtgaagct gcgcgccacc aacttcccc cgcacggccc chtaattgcag agaagacca  
2221 tgggctggga ggcctcctcc gagcggatgt accccgagga cggcgccctg aagggcgaga  
2281 tcaagcagag gctgaagctg aaggacggcg gccactacga cgtgaggtc aagaccact  
2341 acaaggccaa gaagcccgtg cagctgcccg gcgcctacaa cgtcaacatc aagtggaca  
2401 tcacctccca caacgaggac tacaccatcg tggaaacagta cgaacggcc gagggccgcc  
2461 actccaccgg cggcatggac gagctgtaca agtccggact cagatctcga gctcaagctt  
2521 cgaattcagg cggcgccgcc gccatggaca tcatctctgt ggctctgaag agacatagca  
2581 caaaggcttt tgatgccagc aagaaactga cccctgagca ggctgagcag atcaagacac  
2641 tgctgcagta cagcccaagc agccagaaca gccagccttg gcattttatt gtggcttcta  
2701 cagaggagg aaaggctaga gtggctaagt ctgctgctgg aaattatggt ttctctgaga  
2761 gaaagatgct ggaagcctct catgtggtgg tgttctgtgc taagacagcc atggatgatg  
2821 tgtggctgaa actggtggtg gaccaggagg atgctgatgg aagatttgcc acacctgagg  
2881 ctaaggctgc taatgataag ggaagaaagt tcacagctga tatgcacaga aaggacctgc  
2941 atgatgatgc tgagtggatg gctaagcagg tgtatctgaa tgtgggaaac ttctgctgg  
3001 gagtggctgc tctgggactg gatgctgtgc ctattgaggg atttgatgct gctatcctgg  
3061 atgctgagtt tggactgaag gagaaggatg acaccagcct ggtggtggtg ccagtgggac  
3121 accactctgt ggaggatttt aatgtctaac tgcctaagag cagatgctcct cagaacatca  
3181 ccctgacaga ggtgtaagag ctgcaattcg cccttaggcc tgcaggatca taatcagcca  
3241 taccacattt gtagaggttt tacttgcttt aaaaaacct ccacacctcc cctgaacct  
3301 gaaacataaa atgaatgcaa ttgttgttgt taacttgttt attgcagctt ataattggtta  
3361 caaataaagc aatagcatca caaatttcac aaataaagca tttttttcac tgcattctag  
3421 ttgtggtttg tccaaactca tcaatgtatc ttaaactagg ggggatctgc tagcagataa  
3481 ctgatcagct tgaagttcct atactttcta gagaatagga acttcggaat aggaacttca  
3541 agatccccct ggcgaaaggg ggatgtgctg caaggcgatt aagttgggta acgccagggg  
3601 tttcgtcagg tggcactttt cggggaaatg tgcgcggaac ccctatttgt ttatttttct  
3661 aaatacattc aaatatgtat ccgctcatga gacaataacc ctgataaatg cttcaataat  
3721 attgaaaaag gaagatcct gagggcgaaa gaaccagctg tggaatgtgt gtcagttagg  
3781 gtgtgaaag tccccaggg tccccaggc cagaagtatg caaagctatg atctcaatta  
3841 gtcagcaacc aggtgtggaa agtccccagg ctccccagca ggcagaagta tgcaaagcat  
3901 gcatctcaat tagtcagtaa ccatagtccg caaagatcga tcaagagaca ggatgaggat  
3961 cgtttcgcat gattgaacaa gatggattgc acgcaggttc tccggccgct tgggtggaga  
4021 ggctattcgg ctatgactgg gcacaacaga caatcggctg ctctgatgcc gccgtgttcc  
4081 ggctgctcag gcagggcgc cgggttcttt ttgtcaagac cgactgttc ggtgccccga  
4141 atgaactgca agacgaggca cgcggcttat cgtggctggc caccagctgc gttccttgcg  
4201 cagctgtgct cgacgttctc actgaagcgg gaagggactg gctgctattg ggcgaagtgc

Supplementary Data 4

4261 cggggcagga tctcctgtca tctcaccttg ctctgcca gaaagtatcc atcatggctg  
 4321 atgcaatgcg gcggctgcat acgcttgatc cggctaccctg cccattcgac caccaagcga  
 4381 aacatcgcat cgagcgagca cgtactcgga tggaaagccgg tcttgctgat caggatgatc  
 4441 tggacgaaga gcatcagggg ctgcgcccag ccgaactggt cgccaggctc aaggcgagca  
 4501 tgcccagcgg cgaggatctc gtcgtgacct atggcgatgc ctgcttgccg aatatcatgg  
 4561 tggaaaatgg cgccttttct ggattcatcg actgtggccg gctgggtgtg gcggaccgct  
 4621 atcaggacat agcgttggct acccgtgata ttgctgaaga gcttggcggc gaatgggctg  
 4681 accgcttctt cgtgctttac ggtatcgccg ctcccgattc gcagcgcacg gccttctatc  
 4741 gcccttctga cgagttcttc tgaggggatc ggcaataaaa agacagaata aaacgcacgg  
 4801 gtgttgggtc gtttgttcgg atccgagctt caaaagcgtc ctgaagtctc tatactttct  
 4861 agagaatagg aacttcggaa tagtaacttc tccatggtag cctccaaaaa agcctcctca  
 4921 ctacttctgg actagtgcgg ccgcgctgtt aagtggcctg tgactacgca gtgtcattat  
 4981 cttacagaat aggtttggac ccagatggtt tgggtgcctgg aggttttaaa ttttggaaag  
 5041 cccatctcag gaaaaaaaaa aaccataaaa ttatgaatac agaggtgttg ggctgcctc  
 5101 gggacttgaa agggagcttg taatttgggg accagaggtt taaatcccta tagtttact  
 5161 gtgaattatt caccttgctc aaactttcac tctgagaggg tcctgatta ggtgcctagc  
 5221 gagaccagct ggatgtagct ttgtgctctt tctctgttg attttctccg ctttaattaag  
 5281 aattcgtaat catgtcatag ctgtttcctg tgtgaaattg ttatccgctc acaattccac  
 5341 acaacatacg agccggaagc ataaagtgtg aagcctgggg tgccaatga gtgagctaac  
 5401 tcacattaat tgcgttgcgc tcaactgccc ctttccagtc gggaaacctg cgtgaccgac  
 5461 tgcattaatg aatcgccaa cgcgcgggga gaggcgggtt gcgtattggg cgtcttccg  
 5521 cttcctcgct cactgactcg ctgctcggg tctgttcggct gcggcgagcg gtatcagctc  
 5581 actcaaaggc ggtaatacgg ttatccacag aatcagggga taacgcagga aagaacatgt  
 5641 gagcaaaagg ccagcaaaag gccaggaacc gtaaaaaggc cgcgttgctg gcgtttttcc  
 5701 ataggctccg cccccctgac gagcatcaca aaaatcgacg ctcaagtcag aggtggcgaa  
 5761 acccgacagg actataaaga taccagcgtt tccccctgg aagctccctc gtgcgctctc  
 5821 ctgttccgac cctgcccgtt accggatacc tgtccgcctt tctcccttcg ggaagcgtgg  
 5881 cgctttctca aagctcacgc tgtaggtatc tcagttcggg gtaggtcgtt cgctccaagc  
 5941 tgggctgtgt gcacgaacc cccgttcagc ccgaccgctg cgccttatcc ggtaactatc  
 6001 gtcttgagtc caaccggta agacacgact tatcgccact ggcagcagcc actggttaaca  
 6061 ggattagcag agcgaggtat gtaggcgggt ctacagagtt cttgaagtgg tggcctaact  
 6121 acggctacac tagaagaaca gtatttggta tctgcgctct gctgaagcca gttaccttcg  
 6181 gaaaaagagt tggtagctct tgatccggca aacaaaccac cgctggtagc ggtggtttt  
 6241 ttgtttgcaa gcagcagatt acgcgagaa aaaaaggatc tcaagaagat cttttagatc  
 6301 tttctacggg gtctgacgct cagtggaacg aaaactcacg ttaagggatt ttggtcatga  
 6361 gattatcaaa aaggatcttc acctagatcc ttttaatta aaaatgaagt tttaaatcaa  
 6421 tctaaagtat atatgagtaa acttggctcg acagttacca atgcttaac agtgaagcac  
 6481 ctatctcagc gatctgtcta tttcgttcat ccatagttgc ctgactcccc gtcgtgtaga  
 6541 taactacgat acgggagggc ttaccatctg gccccagtg tgcaatgata ccgagagacc  
 6601 cacgctcacc ggctccagat ttatcagcaa taaaccagcc agccggaagg gccgagcgca  
 6661 gaagtggctc tgcaacttta tccgcctcca tccagctat taattgttgc cgggaagcta  
 6721 gagtaagtag ttcgccagtt aatagtttgc gcaacgttgt tgccattgct acagggcatc  
 6781 tgggtcacg ctcgctgctt ggtatggctt cattcagctc cggttcccaa cgatcaaggg  
 6841 gagttacatg atccccatg ttgtgcaaaa aagcggttag ctccttcggg cctccgatcg  
 6901 ttgtcagaag taagtggcc gcagtgttat cactcatggt tatggcagca ctgcataatt  
 6961 ctcttactgt catgccatcc gtaagatgct tttctgtgac tgggtgagtac tcaaccaagt  
 7021 cattctgaga atagtgtat cggcgaccga gttgctcttg cccggcgctc atacgggata  
 7081 ataccgcgc acatagcaga actttaaaag tgctcatcat tggaaaacct tcttcggggc  
 7141 gaaaactctc aaggatctta ccgctgttga gatccagttc gatgtaacc actcgtgcac  
 7201 ccaactgatc ttcagcatct tttactttca ccagcgtttc tgggtgagca aaaaaggaa  
 7261 ggcaaaatgc cgcaaaaaag ggaataaggc cgacacggaa atgttgaata ctcatactct  
 7321 tcctttttca atattattga agcatttatc agggttattg tctcatgagc ggatacatat  
 7381 ttgaatgtat ttagaaaaat aaacaaatag gggttccgcg cacatttccc cgaaaagtgc  
 7441 cacctgacgt ctaagaaacc attattatca tgacattaac ctataaaaaat aggcgtatca  
 7501 cgaggccctt tcgtc

//
